# Supplementary material for: Encouraging tribomechanical and biological responses of hydroxyapatite coatings reinforced by various levels of niobium pentoxide particles
Source: Royal Society of Chemistry journal article supplement (doi:10.1039/d3ma00704a), 2023-01-01
Supplement: d3ma00704a1.pdf [file d3ma00704a1.pdf]

**Encouraging tribomechanical and biological responses of hydroxyapatite coatings  
reinforced by various levels of niobium pentoxide particles**

Mir Saman Safavi<sup>1,2\*</sup>, Jafar Khalil-Allafi<sup>1\*</sup>, Amir Motallebzadeh<sup>3</sup>, Cristina Volpini<sup>2</sup>, Vida  
Khalili<sup>4</sup>, Livia Visai<sup>2,5\*</sup>

<sup>1</sup>Research Center for Advanced Materials, Faculty of Materials Engineering, Sahand University  
of Technology, Tabriz, Iran, P.O. Box: 51335-1996.

<sup>2</sup>Molecular Medicine Department (DMM), Center for Health Technologies (CHT), UdR INSTM,  
University of Pavia, Via Taramelli 3/B, 27100 Pavia, Italy.

<sup>3</sup>Koç University Surface Science and Technology Center (KUYTAM), Koç University, İstanbul,  
Türkiye.

<sup>4</sup>Institut für Werkstoffe, Ruhr-Universität Bochum, Universitätsstrasse 150, D-44780 Bochum,  
Germany.

<sup>5</sup>Medicina Clinica-Specialistica, UOR5 Laboratorio di Nanotecnologie, ICS Maugeri, IRCCS,  
27100 Pavia, Italy.

\*Corresponding authors: Prof. Jafar Khalil-Allafi (jallafi@yahoo.de), Prof. Livia Visai  
(livia.visai@unipv.it), and Mir Saman Safavi (samansafavi1992@gmail.com)

**Supplementary figures**

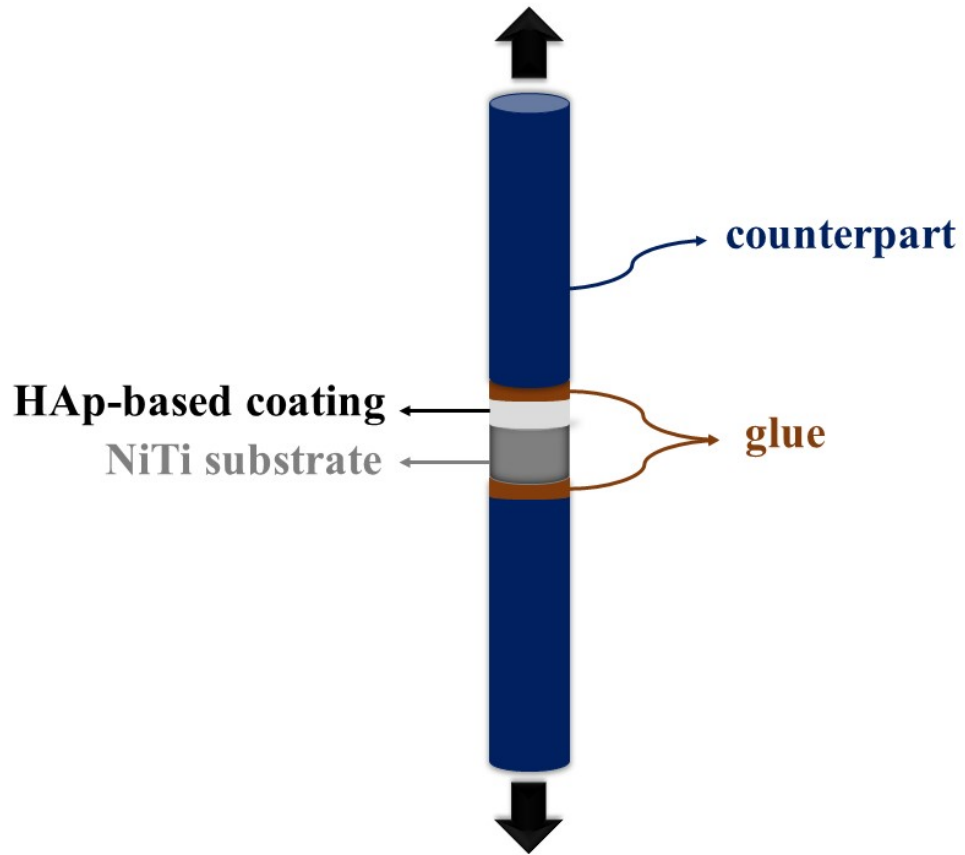

**Figure I.** Schematic exhibition of the pull-off test.

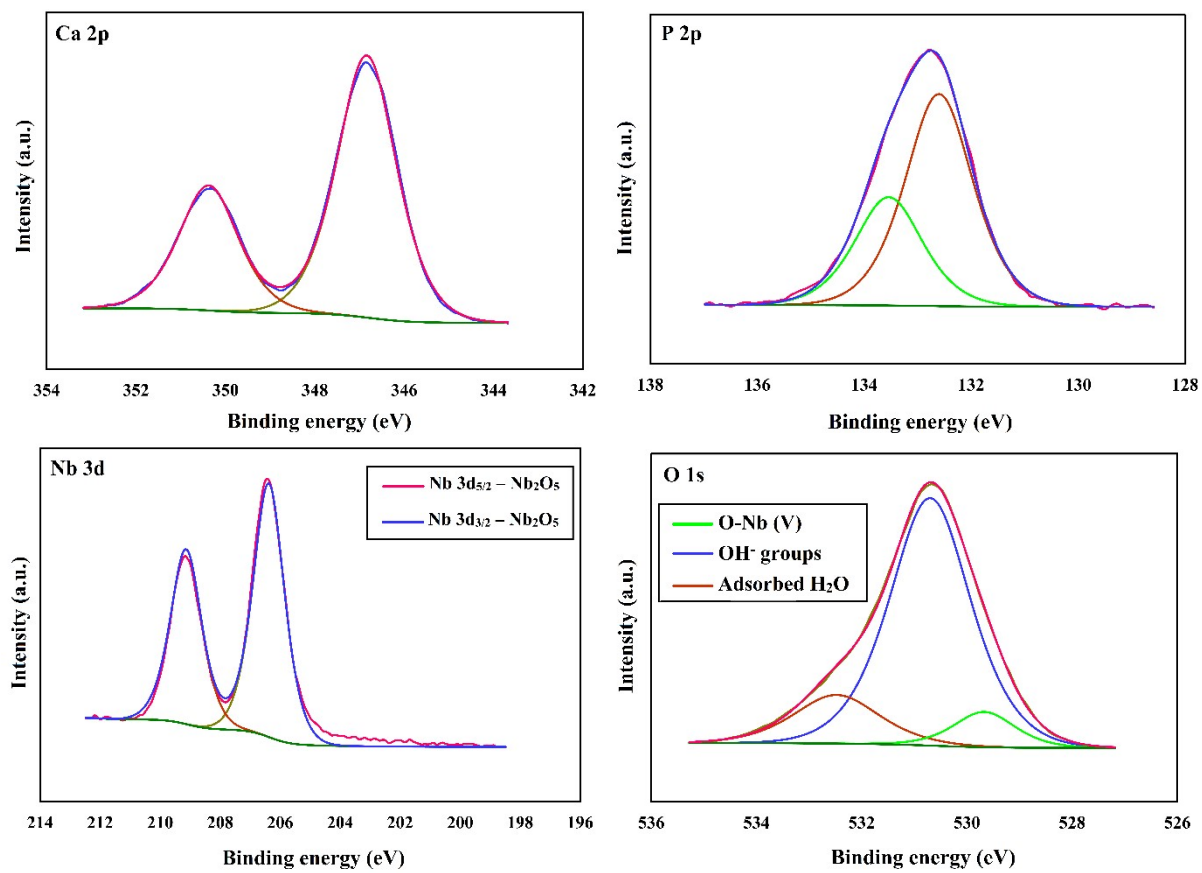

**Figure II.** XPS high-resolution spectra of Ca 2p, P 2p, O 1s, and Nb 3d regions in the S3 sample.

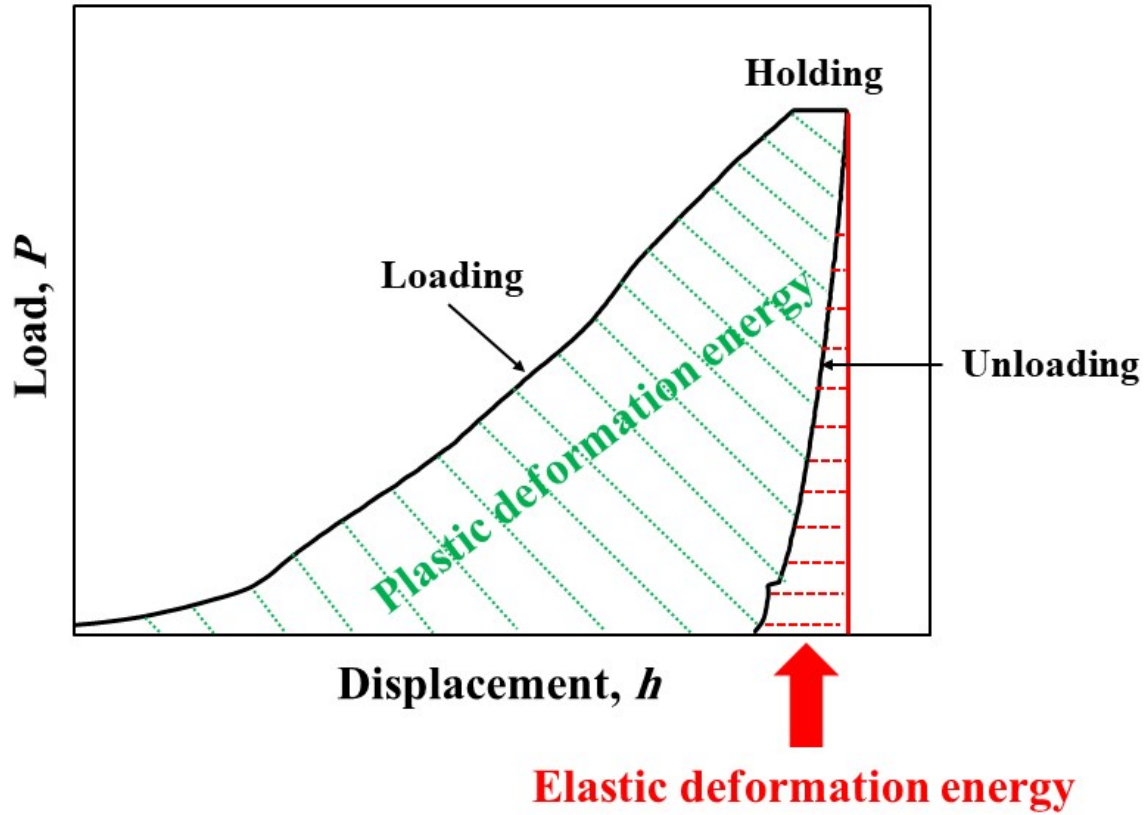

Figure III. Loading and unloading paths, as well as plastic deformation and elastic deformation areas on the typical load-displacement curve.

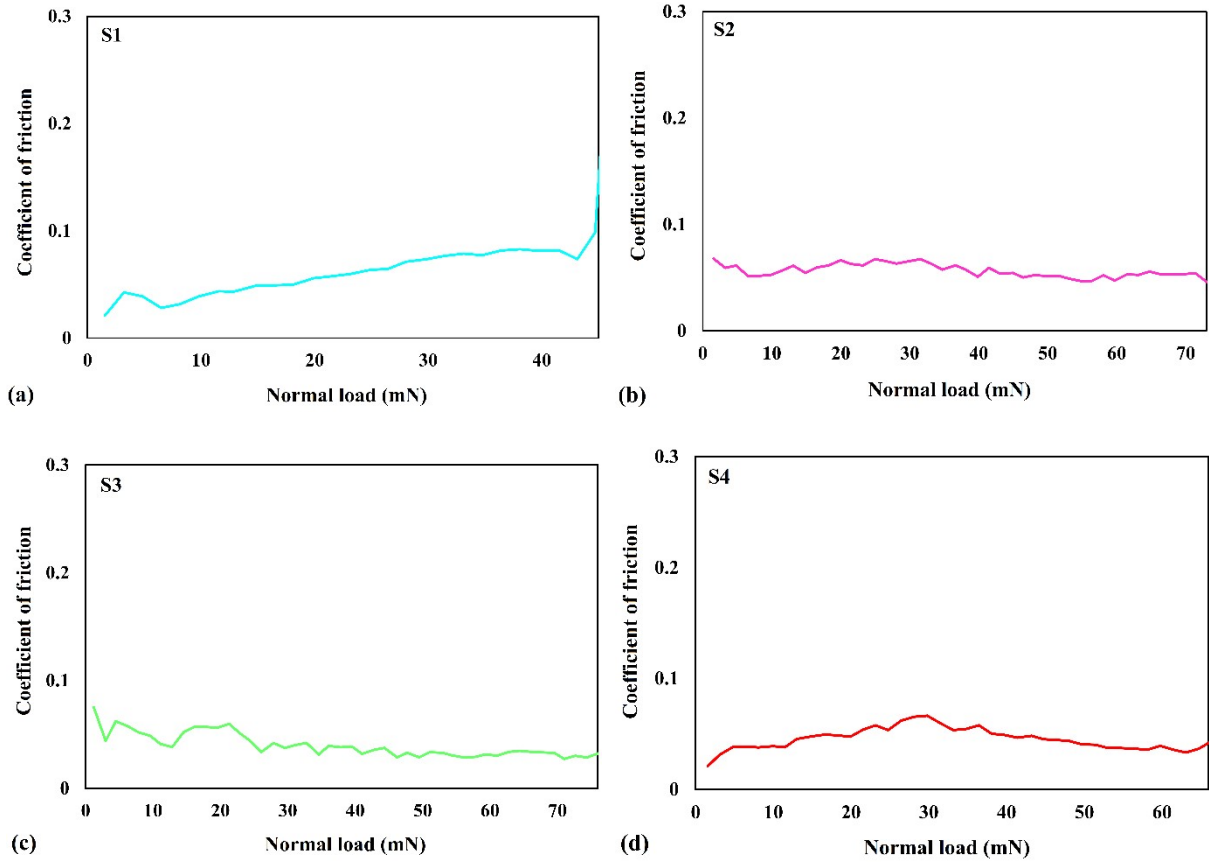

**Figure IV.** The COF-load curves obtained from the scratch test data: (a) S1, (b) S2, (c) S3, and (d) S4.

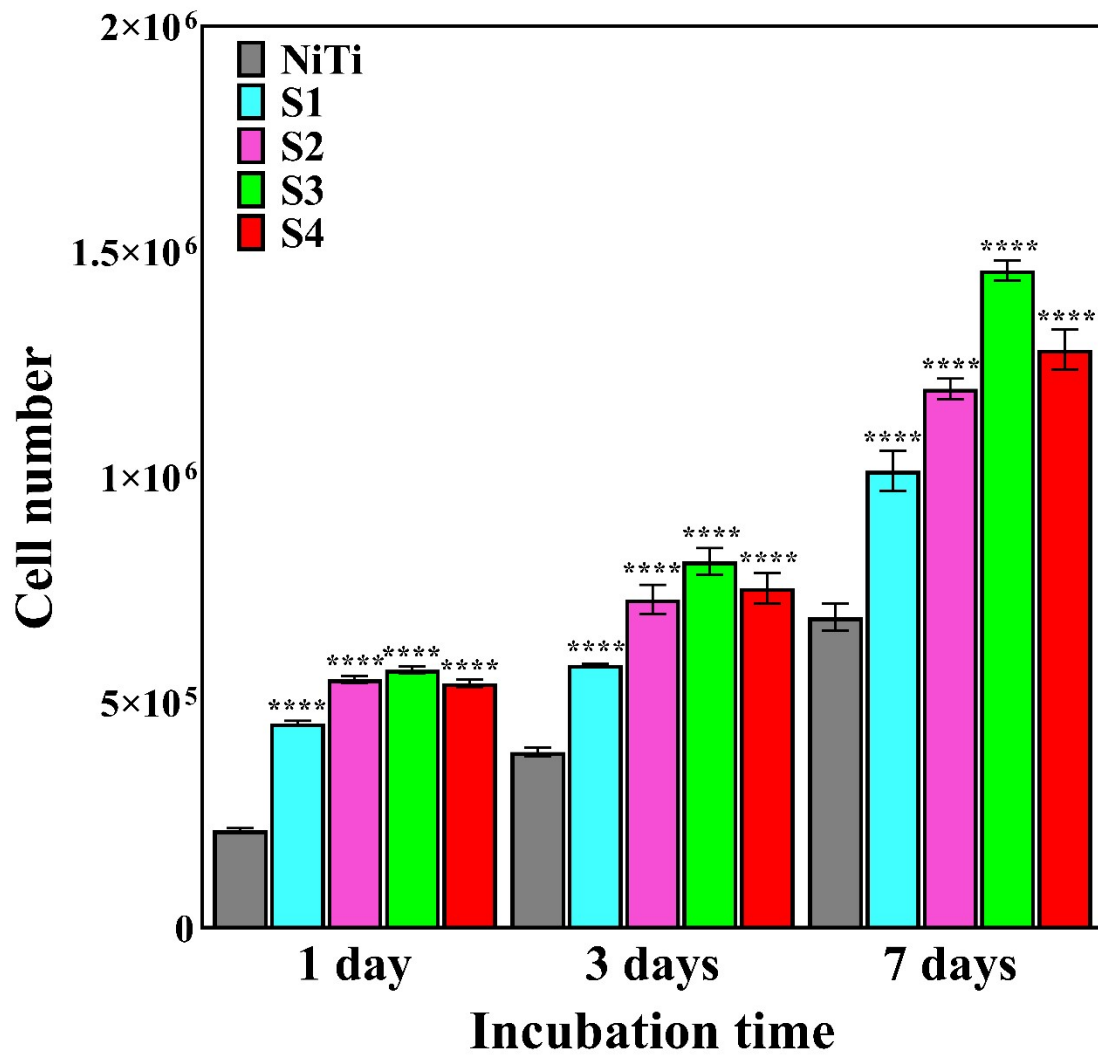

Figure V. The number of NIH3T3 viable cells on the specimens after various culture times

(\*\*\*\* $p < 0.0001$  vs. NiTi).

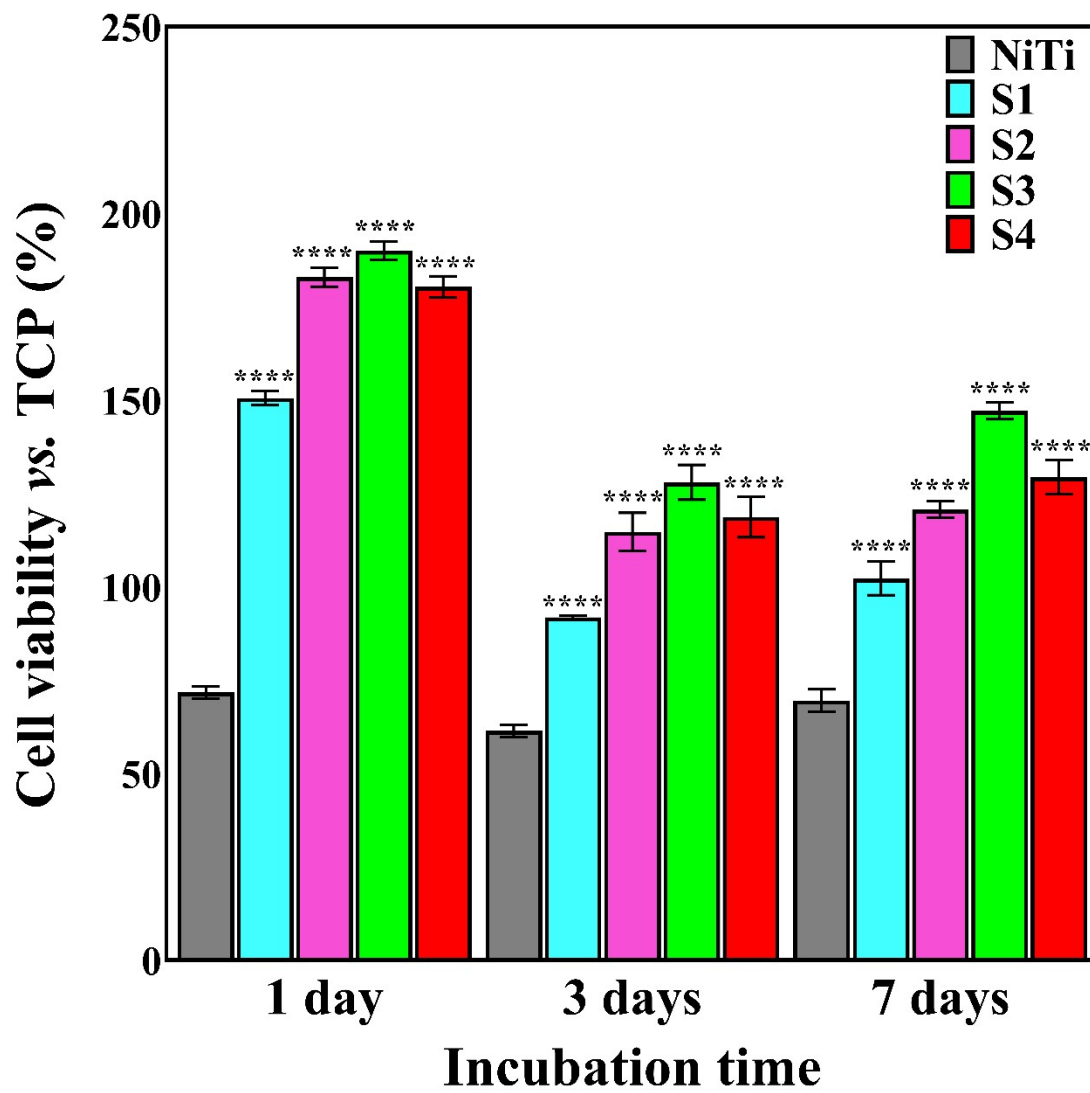

**Figure VI.** Cell viability of NIH3T3 cells on the specimens versus tissue culture plate (TCP) after various culture times (\*\*\*\* $p < 0.0001$  vs. NiTi).
